# Supplementary material
Source: PubMed Central journal article supplement (PMC3511770)
Supplement: 1209542109_pnas.201209542SI.pdf [file 1209542109_pnas.201209542SI.pdf]

# Supporting Information

Grinsted et al. 10.1073/pnas.1209542109

## SI Methods

**S1. Construction of the Surge Index.** The selection criteria for the six tide gauges used in the construction of the surge index are presented in the main text. Here we summarize the steps involved in our calculation of the surge index.

- i) For each station we do the following:
  - a) Apply a 24-h smoothing to the hourly series, thus obtaining a moving average daily average sea-level series. Gaps shorter than 3 h are in-filled by linear interpolation.
  - b) Calculate the squared day-to-day differences from this daily sea-level series.
  - c) Down-sample this series to a daily surge series, using daily block maxima.
  - d) Remove the annual cycle by division. The different tide-gauge locations have different sensitivities, due to local effects such as bathymetry, and normalizing by the seasonal cycle brings the records to a common reference. The background seasonal cycle is determined from the second percentile of data within a moving 21-d-wide seasonal slice. The estimated seasonal cycle is smoothed using a 180-d-long robust loess filter with periodic boundary conditions.
  - e) Decluster the record. Single storm events may cause broad peaks that last several days. We therefore remove samples that are smaller than the local 3-d maximum value.
- ii) Combine the six deseasonalized surge records into a single record of daily maximum values. We allow a maximum of one station missing when calculating the maximum value. Declustering (step *i, e*) is ignored on the rare dates, when it would have removed data from all six stations.
- iii) Rescale the final surge index containing the record of daily maximal surge values to have median = 1.

The conclusions of this paper are insensitive to minor changes in the procedure. However, the justification for our further analysis using the generalized extreme value distribution hinges on the series being approximately stationary on subannual scales. Therefore, the performance of step *i, d* is important. We have therefore verified that step *i, d* removes the kink in the distribution at frequencies corresponding to annual return periods.

Steps *i, a* and *i, b* act to remove the tidal signal and the trend. The remaining signal is completely dominated by nontidal components and primarily wind-driven changes in sea level. This can be easily verified as steps *i, a* and *i, b* can be combined into a simple finite impulse response filter and the resulting frequency response can be examined. As an example, for Mayport the modeled hourly tidal signal [from National Oceanic and Atmospheric Administration (NOAA)] has a SD of 0.50 m; applying step *i, a* reduces this to 0.10 m; and applying step *i, b* reduces this to 0.01 m. Finally, we have repeated the entire analysis but explicitly remove the tidal signal before step *i, a* and obtain near identical results.

There are unfortunately a few gaps in the tide-gauge records, and some of these gaps could have been caused by extreme weather. Here we compare the tide-gauge records with the Atlantic Hurricane Database (HURDAT) to determine which gaps could be caused by the passing of a storm. It is implausible that storms passing close to tide gauges were not well documented. We have chosen a few simple criteria to screen for gaps that might be related to the passing of a storm:

The data gap start must overlap the timing of the storms making landfall within a  $\pm 24$ -h margin.

The storm must have been within 250 km of the tide gauge at the onset of the gap.

The start of the storm must precede the onset of the data gap (allowing for a 6-h slack).

From Table S1 (and Fig. S2) we see that by these criteria only eight data gaps can possibly be related to the passing of a storm. These gaps in the tide-gauge records quite likely correspond to some large storm surges that are missing in the surge index record. We have therefore made a sensitivity test where we set the surge index at the “gap-start” dates manually to have the same magnitude as Hurricane Katrina 2005. Our results are robust to this test.

**S2. Events with the Largest Surge Index.** In Table S2 we show the surge index of the 50 greatest events. A surge will generally also lead to a secondary peak the following day as sea level returns toward the background level. For this reason dates are not exact. Secondary peaks within 4 d of larger peaks are excluded from this list as they are considered to be the same event. In Table S2 we have also calculated accumulated cyclone energy (ACE) and US-ACE over the week centered on the date shown. We caution against comparing the relative rank of individual events. The surge index ranking reflects the impact at the specific tide-gauge locations and therefore should not be interpreted as a storm ranking. The purpose of this list is to demonstrate that the surge index truly captures cyclone activity, rather than providing a storm severity ranking.

A few events outside the hurricane season cannot be attributed to tropical cyclones. Several of these events, however, show up in other records of extreme weather; e.g., the large March 13, 1993 event is commonly known as the 1993 superstorm (1). NOAA has an extensive record of this event.

**S3. GEV Distribution Fitting.** The general method of fitting a distribution ( $f$ ), with parameters ( $m$ ), to a series ( $x$ ) involves maximizing the likelihood function

$$L(m) = \prod_i f_m(x_i), \quad [\text{S1}]$$

where  $i$  is an index into the series  $x$ . In practice, this is usually done by minimizing  $-\log(L)$ . The method can be easily extended to nonstationary distributions by having  $m$  vary with time ( $i$ ). In this study, we achieve this by letting  $m$  be dependent on global temperature. The calculation of  $L$  can easily be parallelized and for some distribution functions it may be advantageous to perform this calculation on a graphical processing unit.

The confidence intervals of the model parameters are given by the likelihood function. We sample the parameter space according to the likelihood density, using Markov chain Monte Carlo (MCMC) using the Metropolis–Hastings algorithm (2). Regions of the parameter space that are likely will be sampled with a high density whereas less likely regions will be sampled less densely. From the percentiles of the sampling density we determine the confidence intervals. In this study we denote the median of the likelihood distribution as the “best guess” that is more robust than using the maximum-likelihood model.

We verify convergence of the MCMC solutions by manual inspection of the accepted models and their autocorrelation structure. In this study, our likelihood functions are very cheap to calculate, and we can afford to make the MCMC runs much longer than is strictly necessary. We speed up convergence, by taking random steps in a linearly transformed model space chosen on the basis of a principal component analysis (PCA) of the

accepted models from an initial shorter MCMC run. We observe that the burn-in is usually confined to the shorter initial MCMC run, and that the transformed steps almost always gives near optimal rejection rates.

Under certain conditions the central limit theorem states that the sum of a set of independent random variables will approach a normal distribution in the limit of infinitely large sets. Analogously, the distribution of block maxima approaches the generalized extreme value (GEV) distribution as the blocks get larger (3). For that reason we expect that block maxima of the surge index

model block maxima: the Weibull, Frechet, and Gumbel distributions. The flexibility lets the data decide which distribution is appropriate.

It is sometimes argued (e.g., ref. 3) that taking block maxima is a wasteful method to infer statistics of extreme events. The reasoning is that there may be a small chance that two very large events are inside the same block and that taking block maxima could be discarding one of the already rare large events. The peaks-over-threshold (POT) method is the usual proposed alternative, where a distribution is fitted to all events that are

$$f_{m=(k,\mu,\sigma)}(x) = \begin{cases} \frac{1}{\sigma} \left(1 + k \frac{x-\mu}{\sigma}\right)^{-1-\frac{1}{k}} e^{-\left(1+k \frac{x-\mu}{\sigma}\right)^{-\frac{1}{k}}} & \text{for } 1 + \frac{k(x-\mu)}{\sigma} > 0 \text{ and } k \neq 0 \\ \frac{1}{\sigma} e^{\frac{\mu-x}{\sigma}} - e^{\frac{\mu-x}{\sigma}} & \text{for } k = 0 \\ 0 & \text{otherwise,} \end{cases} \quad [\text{S2}]$$

should follow a GEV distribution. The GEV distribution, used in this study, can be described by

where  $\mu$ ,  $\sigma$ , and  $k$  are the location, scale, and shape parameters, respectively. In the MCMC inference of the GEV model we use the conventional uniform priors on  $\mu$ ,  $\log(\sigma)$ , and  $k$ .

We are interested in the return period of large and rare events. We find that the surge index maxima of 7-d blocks can be accurately modeled by the GEV distribution over a wide range of magnitudes (Fig. 3). Sensitivity tests show that our results are not sensitive to larger block sizes. The GEV distribution is flexible and combines three simpler types of distributions commonly used to

above a certain threshold. The advantage is that no large events are discarded. The drawback of the POT approach is that return periods can be calculated only if the frequency of threshold crossing is known. The threshold return period can be estimated using empirical cumulative distribution. However, this empirical estimate assumes stationarity and the POT method is hence ill-suited for nonstationary series. For that reason we use exclusively the GEV distribution. However, our conclusions are insensitive to different block sizes and we get compatible results using POT analysis; we conclude that extreme event wastage is not an issue.

1. Kocin PJ, Schumacher PN, Morales RF, Uccellini LW (1995) Overview of the 12–14 March 1993 superstorm. *Bull Am Meteorol Soc* 76:165–182.
2. Hastings WK (1970) Monte Carlo sampling methods using Markov chains and their applications. *Biometrika* 57:97–109.

3. Coles S (2001) *An Introduction to Statistical Modeling of Extreme Values* (Springer, London).

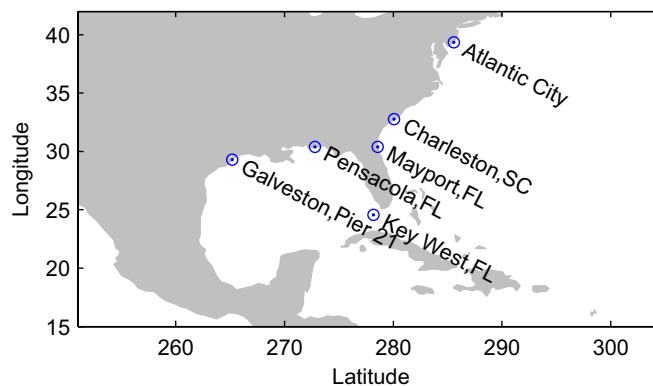

Fig. S1. Map showing locations of tide gauges used in the construction of the surge index.

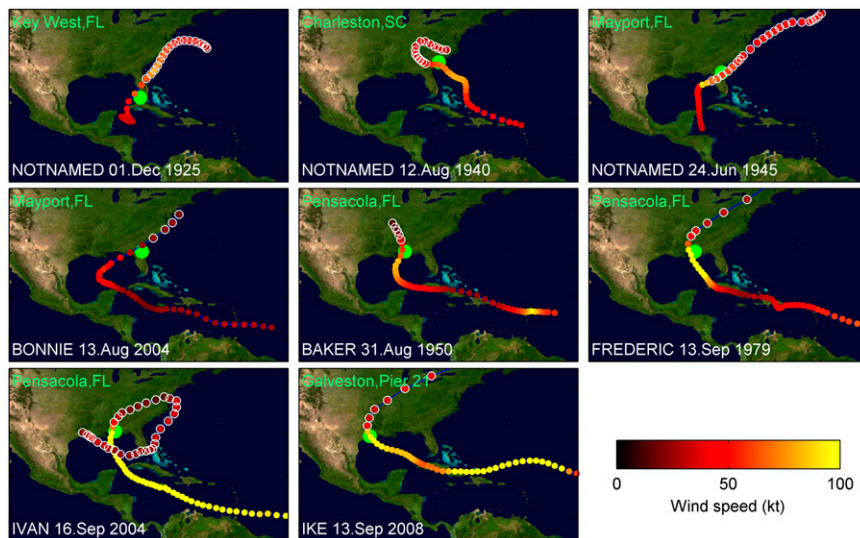

Fig. S2. Tracks of storms (blue line) that likely are the cause of gaps in the tide-gauge records. Red-yellow dots indicate wind speed at 6-h intervals; green shows tide-gauge location. White circles indicate when the tide gauge has missing data.

Table S1. Tide-gauge data gaps that coincide with storm landfall

| Tide gauge         | Gap start             | Wind, kt | Distance, km | Storm name |
|--------------------|-----------------------|----------|--------------|------------|
| Key West, FL       | Dec. 1, 1925; 07:00   | 65       | 158          | Not named  |
| Charleston, SC     | Aug. 12, 1940; 07:00  | 70       | 77           | Not named  |
| Mayport, FL        | June 24, 1945; 03:00  | 95       | 118          | Not named  |
| Mayport, FL        | Aug. 13, 2004; 06:00  | 45       | 128          | Bonnie*    |
| Pensacola, FL      | Aug. 31, 1950; 14:00  | 83       | 63           | Baker      |
| Pensacola, FL      | Sept. 13, 1979; 17:00 | 115      | 119          | Frederic   |
| Pensacola, FL      | Sept. 16, 2004; 18:00 | 115      | 60           | Ivan       |
| Galveston, Pier 21 | Sept. 13, 2008; 15:00 | 95       | 8            | Ike        |

List of HURDAT storms that coincide with data gaps in the tide-gauge records (see text for selection criteria). "Gap start" shows the date of the first missing sample. "Wind" shows the maximum wind speed in the 24-h days preceding the gap. "Distance" refers to the closest distance to tide gauge in the 24 h centered on the gap start. \*Tropical storm Bonnie had similar timing to hurricane Charley and both could be responsible for the tide-gauge outage.

**Table S2. 50 greatest events**

| Rank | Event date     | Candidate storm (category)  | Surge index | ACE     | US-ACE  | Wind, kt |
|------|----------------|-----------------------------|-------------|---------|---------|----------|
| 1    | Sept. 20, 1926 | "Great Miami hurricane" (4) | 283         | 422,098 | 228,174 | 125      |
| 2    | July 25, 1934  | Not named (1)               | 153         | 39,450  | 39,450  | 65       |
| 3    | Sept. 19, 1947 | Not named (5)               | 139         | 223,806 | 223,806 | 130      |
| 4    | Sept. 10, 1961 | Carla (5)                   | 114         | 588,267 | 312,007 | 125      |
| 5    | Aug. 30, 2005  | Katrina (5)                 | 113         | 189,274 | 167,424 | 110      |
| 6    | July 10, 2005  | Dennis (4)                  | 107         | 207,799 | 188,024 | 120      |
| 7    | Sept. 12, 2008 | Ike (4)                     | 104         | 146,499 | 143,599 | 100      |
| 8    | Sept. 10, 1965 | Betsy (4)                   | 94          | 169,699 | 169,699 | 135      |
| 9    | Sept. 1, 1932  | Not named (1)               | 89          | 172,324 | 65,775  | 70       |
| 10   | June 28, 1957  | Audrey (4)                  | 86          | 79,474  | 79,474  | 125      |
| 11   | Sept. 27, 1998 | Georges (4)                 | 85          | 463,173 | 155,699 | 95       |
| 12   | Sept. 1, 2008  | Gustav (4)                  | 70          | 326,423 | 300,849 | 125      |
| 13   | Oct. 6, 1995   | Opal (4)                    | 59          | 180,099 | 91,975  | 110      |
| 14   | Aug. 5, 1940   | Not named (1)               | 57          | 117,449 | 117,449 | 70       |
| 15   | Aug. 18, 1969  | Camille (5)                 | 57          | 362,419 | 217,996 | 165      |
| 16   | Aug. 13, 1932  | Not named (4)               | 55          | 64,600  | 64,600  | 125      |
| 17   | Oct. 25, 2005  | Wilma (5)                   | 55          | 190,674 | 161,224 | 110      |
| 18   | July 15, 2003  | Claudette (1)               | 55          | 81,050  | 56,875  | 75       |
| 19   | Oct. 4, 1964   | Hilda (4)                   | 53          | 166,994 | 166,994 | 83       |
| 20   | Sept. 15, 2004 | Ivan (5)                    | 53          | 406,723 | 364,298 | 105      |
| 21   | Aug. 17, 1983  | Alicia (3)                  | 52          | 68,500  | 68,500  | 100      |
| 22   | Aug. 31, 1942  | Not named (3)               | 49          | 162,324 | 93,275  | 70       |
| 23   | Aug. 26, 1926  | Not named (3)               | 48          | 110,974 | 110,974 | 95       |
| 24   | Sept. 27, 2002 | Isidore (3)                 | 47          | 180,174 | 180,174 | 110      |
| 25   | 8-Sep-1974     | Carmen (4)                  | 47          | 168,899 | 124,474 | 120      |
| 26   | Sept. 12, 1979 | Frederic (4)                | 42          | 272,524 | 134,274 | 115      |
| 27   | Sept. 25, 1941 | Not named (1)               | 40          | 229,774 | 57,725  | 70       |
| 28   | April 8, 1938  |                             | 39          |         |         |          |
| 29   | Sept. 19, 1928 | Not named (5)               | 39          | 152,974 | 152,974 | 140      |
| 30   | Feb. 27, 1984  |                             | 39          |         |         |          |
| 31   | Sept. 30, 1959 | Gracie (4)                  | 36          | 281,526 | 104,798 | 96       |
| 32   | Aug. 9, 1980   | Allen (5)                   | 36          | 345,148 | 345,148 | 100      |
| 33   | Sept. 24, 2005 | Rita (5)                    | 35          | 253,274 | 222,699 | 100      |
| 34   | March 14, 1993 |                             | 35          |         |         |          |
| 35   | Sept. 11, 1964 | Dora (3)                    | 35          | 307,606 | 121,637 | 83       |
| 36   | Oct. 28, 1985  | Juan (1)                    | 34          | 79,850  | 79,850  | 65       |
| 37   | June 12, 2005  | Arlene (0)                  | 34          | 31,175  | 31,175  | 50       |
| 38   | Feb. 25, 1965  |                             | 33          |         |         |          |
| 39   | Sept. 2, 1985  | Elena (3)                   | 33          | 145,274 | 145,274 | 100      |
| 40   | Aug. 3, 1933   | Not named (1)               | 31          | 63,500  | 63,500  | 70       |
| 41   | July 6, 1933   | Not named (2)               | 31          | 118,524 |         | 70       |
| 42   | July 30, 1995  | Erin (1)                    | 30          | 65,150  | 65,150  | 80       |
| 43   | Sept. 5, 1979  | David (5)                   | 29          | 206,774 | 158,549 | 150      |
| 44   | Sept. 22, 1948 | Not named (3)               | 29          | 143,824 | 143,824 | 90       |
| 45   | Oct. 19, 1944  | Not named (3)               | 29          | 124,557 | 124,557 | 58       |
| 46   | Oct. 5, 1949   | Not named (3)               | 28          | 75,853  | 75,853  | 112      |
| 47   | Dec. 7, 1969   |                             | 28          |         |         |          |
| 48   | July 24, 1933  | Not named (0)               | 27          | 69,000  | 69,000  | 40       |
| 49   | Aug. 4, 1995   | Erin (1)                    | 26          | 68,925  | 68,925  | 80       |
| 50   | Jan. 21, 1979  |                             | 26          |         |         |          |

ACE and US-ACE are calculated over the week centered at the date shown. Wind shows the maximum landfalling wind speed.
